# Supplementary material for: Coffee Consumption and C-Reactive Protein Levels: A Systematic Review and Meta-Analysis
Source: PubMed Central journal article supplement (PMC7285227; doi:10.3390/nu12051349), 2020-05-08
Supplement: nutrients-12-01349-s001.pdf [file nutrients-12-01349-s001.pdf]

**Supplementary Table S1: Risk of Bias Assessment\***

| <b>First Author, Publication Year,<br/>Study Name</b> | <b>Selection</b> | <b>Comparability</b> | <b>Outcome</b> | <b>Total</b> |
|-------------------------------------------------------|------------------|----------------------|----------------|--------------|
| Aresnault, 2009,<br>Drew trial [26]                   | *                | **                   | ***            | 6            |
| Hang, 2019,<br>NHS/HPFS [18]                          | ***              | **                   | ***            | 8            |
| Gunter, 2017,<br>EPIC study [22]                      | ***              | **                   | **             | 7            |
| Maki, 2010,<br>Kyushu University Cohort [25]          | **               | **                   | ***            | 7            |
| Zampelas, 2004,<br>ATTICA study [17]                  | *****            | **                   | ***            | 10           |
| Rebello, 2011,<br>Singapore Prospective study [19]    | ***              | **                   | ***            | 8            |
| Yamashita, 2012,<br>Aichi Workers' cohort [20]        | **               | **                   | ***            | 7            |
| Hamer, 2006,<br>United Kingdom study [21]             | **               | **                   | ***            | 7            |
| Stutz, 2018,<br>FinnDiane study [23]                  | **               | **                   | ***            | 7            |
| De Bacquer, 2006,<br>BELSTRESS study [24]             | ***              | none                 | ***            | 6            |

\*Maximum number of stars is 5 for Selection, 2 for Comparability, and 3 for Outcome.
